# Supplementary material
Source: HighWire-hosted journal article supplement (https://cmaj.ca/content/suppl/2007/08/01/158.3)
Supplement: guide9.pdf [file guide9.pdf]

## **Guide de pratique clinique pour la prise en charge et le traitement du cancer du sein**

### **9. Le suivi après traitement du cancer du sein (mise à jour de 2005)**

Eva Grunfeld, Sukhbinder Dhesy-Thind et Mark Levine, pour le Comité directeur des guides de pratique clinique pour la prise en charge et le traitement du cancer du sein\*

Le D<sup>r</sup> Grunfeld est professeure de médecine à l'Université Dalhousie et directrice, Recherche sur les services de santé et les résultats, Cancer Care Nova Scotia, Halifax (N.-É.). Le D<sup>r</sup> Dhesy-Thind travaille auprès du Centre régional d'oncologie Juravinski d'Action Cancer Ontario et il est professeur agrégé au Département de médecine de l'Université McMaster, à Hamilton (Ont.). Le D<sup>r</sup> Levine est professeur aux départements d'épidémiologie clinique et biostatistique et de médecine et est titulaire de la chaire Buffet-Taylor de recherche sur le cancer du sein de l'Université McMaster, à Hamilton (Ont.).

\*Le Comité directeur des guides de pratique clinique pour la prise en charge et le traitement du cancer du sein s'inscrit dans l'Initiative canadienne sur le cancer du sein (ICCS) de Santé Canada. (On trouvera la liste des membres ci-dessous.)

Le Guide de la patiente contient des questions et réponses pour les femmes qui reçoivent des soins de suivi. Il a également été mis à jour. On le trouvera à [www.cmaj.ca/cgi/data/158/3/DC2/19](http://www.cmaj.ca/cgi/data/158/3/DC2/19).

#### **Résumé**

**Objectif :** fournir des renseignements et des recommandations aux patientes et à leurs médecins sur les stratégies de suivi et les sujets pertinents au suivi après traitement du cancer du sein.

**Preuves :** analyse systématique de la littérature scientifique en anglais dans MEDLINE (de 1991 à janvier 2004). Une analyse non systématique de la littérature s'est poursuivie jusqu'en janvier 2005.

#### **Recommandations**

Toutes les patientes atteintes de cancer du sein devraient faire l'objet d'un suivi régulier.

La fréquence des consultations devrait être déterminée en fonction des besoins de chaque patiente.

Toutes les consultations devraient comporter une anamnèse. Dans le cas des femmes qui prennent du tamoxifène, il est important de s'informer des saignements vaginaux. Le médecin examinera les seins, les ganglions lymphatiques régionaux, la paroi thoracique, les poumons et l'abdomen, et vérifiera la présence d'un lymphœdème au niveau des bras. Chaque consultation annuelle devrait comporter une mammographie.

On ne devrait pas effectuer de routine des analyses de laboratoire ou des examens radiologiques dans le but de détecter la présence de métastases à distance.

Il faut encourager les patientes à signaler rapidement tout nouveau symptôme persistant sans attendre le prochain rendez-vous.

Lorsqu'une femme souhaite faire l'auto-examen de ses seins, il convient de lui enseigner la bonne procédure.

On devrait encourager et faciliter le soutien psychosocial.

Il faudrait encourager et favoriser la participation aux essais cliniques.

Il faudrait attribuer officiellement à un seul médecin la responsabilité du suivi.

Il faut assurer une bonne communication entre tous les membres de l'équipe de façon à éviter de répéter les consultations et les analyses.

#### *Fonctionnement cognitif*

La chimiothérapie peut avoir un effet prolongé sur le fonctionnement cognitif.

Néanmoins, il n'y a pas de lien entre les plaintes subjectives de déficience cognitive et les mesures objectives.

Il faudrait promouvoir les études de cohorte, comparatives et longitudinales.

#### *Fatigue*

Un quart à un tiers des femmes qui ont eu un cancer du sein éprouvent de la fatigue. Il faudrait interroger les patientes au sujet des symptômes de fatigue qu'elles ressentent.

Il faudrait rechercher les causes physiologiques de la fatigue pour les exclure. La dépression et la douleur constituent des facteurs sous-jacents que l'on peut parfois traiter.

Il faudrait promouvoir les études longitudinales contrôlées de cohortes.

#### *Contrôle du poids*

Il faudrait aborder la question du contrôle du poids avec toutes les femmes qui ont eu un cancer du sein.

Il faudrait encourager les patientes ayant de l'embonpoint à participer à des programmes éprouvés de contrôle du poids.

#### *Ostéoporose*

Les patientes ménopausées, les patientes préménopausées qui sont à risque d'ostéoporose et les patientes qui prennent des inhibiteurs de l'aromatase devraient passer un examen de mesure de la densité osseuse.

Il faudrait conseiller les patientes au sujet de l'exercice et de l'apport adéquat en calcium et en vitamine D.

Le traitement de l'ostéoporose devrait comprendre un bisphosphonate.

#### *Sexualité*

Il faudrait aborder la question de la sexualité avec les femmes lors de leurs visites de suivi.

### *Grossesse*

Il faudrait expliquer aux femmes qui envisagent une grossesse après avoir reçu un diagnostic de cancer du sein qu'il existe peu de données sur les répercussions d'une grossesse sur l'issue du cancer du sein, notamment la récurrence et la survie. La plupart des études ont mis en cause des séries de cas rétrospectifs ou des études cas-témoin portant sur un petit échantillon de patientes. Néanmoins, rien ne prouve à ce jour qu'une grossesse subséquente nuit à la survie des patientes qui ont eu un cancer du sein.

**Validation** : le guide original a été mis à jour par un comité de rédaction qui l'a ensuite présenté pour étude, révision et approbation au Comité directeur des guides de pratique clinique pour la prise en charge et le traitement du cancer du sein. La mise à jour actuelle a fait l'objet d'un examen par les pairs.

**Parrainage** : Santé Canada a convoqué le Comité directeur des guides de pratique clinique pour la prise en charge et le traitement du cancer du sein.

**Date de réalisation** : mars 2005.

Ce guide constitue une mise à jour de la version précédente<sup>1</sup>. Les preuves pertinentes aux objectifs de suivi et aux composantes du programme de suivi ont été mises à jour. De plus, on aborde certaines préoccupations particulières des femmes ayant eu un cancer du sein, telles que le fonctionnement cognitif, la fatigue, le contrôle du poids, l'ostéoporose, la sexualité et la grossesse. Ces sujets n'apparaissent pas dans la version originale du guide de 1998. Les thèmes du traitement hormonal substitutif (voir le Guide 14) et du lymphœdème (voir le Guide 11) sont abordés ailleurs.

## **Méthodes**

Les preuves étudiées aux fins du présent document sont tirées d'une analyse systématique de la littérature scientifique en anglais sur MEDLINE (de 1991 à janvier 2004). Les termes de recherche comprenaient «*breast neoplasm*», «*follow-up*», «*randomized controlled trials*», «*meta analysis*», «*quality of life*», «*fatigue*», «*weight gain*», «*osteoporosis*», «*sexuality*» et «*pregnancy*». On a procédé à une analyse non systématique de la littérature et au suivi des principales conférences sur le cancer du sein jusqu'en janvier 2005.

La qualité des preuves sur lesquelles se fondent les conclusions se répartit en cinq niveaux<sup>2</sup>. Le processus itératif qui servi à concevoir ce guide est décrit ailleurs<sup>3</sup>. Un comité de rédaction a mis à jour le guide original et a présenté cette version actualisée au Comité directeur des guides de pratique clinique pour la prise en charge et le traitement du cancer du sein aux fins d'étude, de révision et d'approbation.

## **Recommandations (y compris les preuves et la justification)**

**Toutes les patientes atteintes de cancer du sein devraient faire l'objet d'un suivi régulier.**

### ***Objectifs du suivi***

Un suivi régulier doit viser à atteindre les quatre objectifs principaux décrits ci-après.

#### **1. Fournir un soutien et des conseils aux patientes**

Les femmes qui ont eu un cancer du sein peuvent connaître divers symptômes physiques et psychologiques au cours de leur suivi. Certains types de symptômes apparaissent peu de temps après la chirurgie et sont attribuables à celle-ci, tels qu'un gonflement des tissus mous, un hématome, un sérome dans la région du sein et l'engourdissement ou la raideur du bras. D'autres symptômes, qui peuvent se

manifester plus tard, peuvent découler de la chirurgie (p. ex. le syndrome post-mastectomie : consulter la mise à jour de 2001 du Guide 10 pour la gestion de la douleur chronique après une mastectomie), de la radiothérapie (p. ex. l'érythème, l'enflure, la sensibilité et l'œdème de la peau : consulter la mise à jour de 2003 du Guide 6), du lymphœdème (consulter le Guide 11) ou des symptômes de la ménopause liés au tamoxifène et provoqués par l'ablation des ovaires ou la chimiothérapie (consulter le Guide 14).

Les problèmes psychosociaux sont plus évidents durant la première année suivant le diagnostic de cancer du sein<sup>4,5</sup>, tandis que l'adaptation psychosociale à long terme est en général excellente<sup>6</sup>. Ganz et ses collaborateurs ont fait état des résultats d'une étude longitudinale de cohorte auprès de 817 femmes ayant eu un cancer du sein sans récurrence<sup>6</sup>. En moyenne, 6,3 ans après le diagnostic, leur bien-être physique et émotionnel était excellent et les changements modestes et non significatifs sur le plan clinique, dans les domaines physiques de la qualité de vie liée à la santé, correspondaient à une population vieillissante. Par contre, le sous-groupe des femmes qui avaient reçu un traitement systémique adjuvant présentait un déclin de plusieurs aspects du fonctionnement physique. Cela laisse entendre que le traitement systémique peut avoir des effets à long terme sur la qualité de vie. Rien ne différenciait la qualité de vie liée à la santé selon le type de chirurgie primaire du cancer du sein, ce qui est conforme aux conclusions d'autres études sur le sujet<sup>7</sup>. Des résultats négatifs ont été constatés sur la vie professionnelle et la carrière dans l'étude de P. A. Ganz et ses collaborateurs<sup>6</sup>, résultats constatés également dans une étude canadienne<sup>8</sup>. Ganz et ses associés ont également effectué une étude rétrospective de la qualité de vie, environ six ans après le diagnostic, chez 577 jeunes (< de 50 ans au moment du diagnostic) femmes ayant eu un cancer du sein<sup>9</sup>. Dans l'ensemble, leur qualité de vie était bonne, mais elle diminuait chez

les femmes de moins de 35 ans, en particulier celles qui ont connu une ménopause précoce. Ganz et ses collaborateurs ont également communiqué les résultats d'un sondage sur la qualité de vie de 691 femmes âgées de 65 ans ou plus qui ont été interviewées à 3 et à 15 mois après une chirurgie pour cancer du sein<sup>10</sup>. La qualité de vie diminuait au départ, mais s'améliorait avec le temps. Chez les femmes qui prennent du tamoxifène, l'extrapolation d'un essai randomisé de tamoxifène contre placebo pour la prévention primaire du cancer du sein semble indiquer que le tamoxifène n'accroît pas le risque de dépression (preuves de niveau I)<sup>11</sup>.

C'est par les consultations de suivi que l'on peut aborder les problèmes physiques et psychologiques et fournir au besoin traitement et réconfort.

## **2. Dépister les symptômes de maladies susceptibles d'être guéries, telles que la récurrence locale du cancer du sein à la suite d'une chirurgie mammaire conservatrice et les nouveaux cancers dans l'autre sein**

Chez les patientes traitées par chirurgie mammaire conservatrice et radiothérapie, la récurrence locale peut se manifester dans le même sein. On a constaté un taux de récurrence locale de 8,8<sup>12</sup> à 14,3 %<sup>13</sup> après 20 ans de suivi. La récurrence locale dans le sein peut souvent être dépistée plus tôt à l'aide d'une mammographie<sup>14</sup> que par un examen médical et peut potentiellement se guérir par une mastectomie<sup>15</sup>. Ainsi, après la chirurgie mammaire conservatrice, on recommande l'examen régulier dans le but de dépister des récurrences locales le plus tôt possible. Néanmoins, la récurrence précoce dans le sein (c.-à-d. un an ou deux ans après la chirurgie) est souvent signe d'une maladie agressive et de métastases à distance<sup>16,17</sup>. Par ailleurs, une récurrence locale au niveau de la cage thoracique après une mastectomie a souvent la même signification pronostique que la métastase à distance, et sa détection et son traitement précoces ont très peu d'influence sur la survie<sup>15</sup>.

On estime que les femmes qui ont eu un cancer du sein courent de deux à six fois plus de risques de développer un nouveau cancer primaire dans l'autre sein que celles qui n'en ont pas été atteintes<sup>18</sup>. Le risque absolu se situe entre 0,5 et 1,0 % par année<sup>19</sup>. Dans une cohorte comprenant des patientes atteintes de cancer du sein qui ont ensuite développé un cancer dans l'autre sein, rien ne distinguait les patientes ayant un cancer unilatéral de celles ayant un cancer bilatéral quant à leurs chances de survie<sup>20</sup>. Dans les cas de cancer du sein bilatéral, le pronostic est déterminé par la tumeur ayant le moins bon pronostic. Au stade précoce du cancer du sein, le dépistage d'un cancer du sein controlatéral peut se révéler bénéfique. Aucune preuve directe ne démontre cependant que le dépistage précoce améliorera les chances de survie de ces patientes.

Une mammographie régulière chez les femmes en santé permet un dépistage plus précoce du cancer du sein et réduit les taux de décès chez les femmes de plus de 50 ans qui en sont atteintes<sup>21</sup>. Nous pouvons donc extrapoler que les mammographies et les examens cliniques réguliers chez les patientes, après traitement pour un cancer du sein, peuvent en fait constituer des mesures de dépistage chez une partie de la population à haut risque et qu'il peut en découler une amélioration de leurs chances de survie. Néanmoins, un tel avantage sera vraisemblablement faible en raison du petit nombre de seconds cancers et de la mortalité concurrente liée au premier cancer.

Le dépistage précoce est malgré tout facilité lorsque des examens cliniques et des mammographies ont été effectués après la disparition des changements inflammatoires découlant de la chirurgie et de la radiothérapie afin d'établir une «base de référence».



### **3. Dispenser des soins aux patientes atteintes d'une maladie métastatique**

Plusieurs études d'observation<sup>22-24</sup>, deux essais contrôlés randomisés<sup>25,26</sup> et une étude en simulation<sup>27</sup> ont démontré que le dépistage précoce des métastases à distance n'améliorait pas la survie (preuves de niveau I). Les symptômes évoluent souvent entre les consultations et les médecins décèlent rarement des anomalies chez les patientes asymptomatiques<sup>22</sup>. Cependant, le traitement précoce des métastases peut parfois avoir une influence sur le taux de morbidité; par conséquent, dans cette perspective, il faut encourager les patientes à signaler rapidement tout nouveau symptôme.

### **4. Surveiller l'évolution de l'état de santé**

Les oncologues reconnaissent que surveiller l'évolution de l'état de santé des patientes en termes de survie, de morbidité et de qualité de vie, notamment, constitue un élément important de l'évaluation de l'efficacité du traitement<sup>28</sup>. Pour évaluer les résultats des traitements en fonction des normes nationales et internationales, il faut recueillir ces renseignements de façon méthodique et complète, et dans un format qui en permet l'analyse régulière.

#### ***Le programme de suivi***

**La fréquence des consultations devrait être déterminée en fonction des besoins de chaque patiente.**

Il n'existe aucune preuve indiscutable à l'appui d'une fréquence particulière de consultation. Dans le cadre d'une étude britannique, les femmes ont reçu un calendrier de consultations de suivi assigné au hasard, soit aux 3 mois au cours de la première année, aux 4 mois la deuxième année et tous les 6 mois de la troisième à la cinquième année, d'une part, soit une consultation par année ou aux 2 ans, d'autre part. Les consultations plus fréquentes n'ont produit aucun avantage et les

patientes des deux groupes ont préféré réduire le nombre des consultations au lieu de les augmenter (preuves de niveau II)<sup>29</sup>. Au cours d'une autre étude britannique, les patientes ont été assignées au hasard pour recevoir un suivi clinique standard ou aucun suivi de routine. Les patientes de ce dernier groupe obtenaient de la documentation écrite au sujet des signes et des symptômes de récurrence accompagnée d'instructions pour communiquer par téléphone avec un infirmier ou une infirmière si elles éprouvaient des problèmes<sup>30</sup>. Même si rien ne différenciait les résultats quant à la qualité de vie liée à la santé ou à la satisfaction des patientes, l'étude n'a duré qu'un an et aucun résultat clinique n'a été constaté (preuves de niveau II).

La fréquence des consultations exige d'établir un équilibre entre les avantages probables pour la santé et les inconvénients, le stress et les coûts des consultations fréquentes ainsi que le nombre de faux résultats positifs qu'elles peuvent générer. Les visites de suivi peuvent rassurer les patientes, mais elles peuvent également causer de l'anxiété et rappeler aux femmes leur maladie sans jamais pouvoir leur garantir une guérison complète<sup>31,32</sup>. Dans le cadre d'un rapport présenté à la Bari Consensus Conference, F. Boccardo et ses collaborateurs ont suggéré 4 visites par année au cours des 2 premières années, 2 visites par année au cours des 3 années suivantes et une visite par année par la suite<sup>33</sup>. La American Society of Clinical Oncology recommande des visites aux 3 à 6 mois pendant les 3 premières années, aux 6 à 12 mois au cours des 2 années suivantes et, ensuite, une fois l'an<sup>34</sup>. En général, il faudrait adapter le suivi aux besoins particuliers de chaque patiente.

**Toutes les consultations devraient comporter une anamnèse. Dans le cas des femmes qui prennent du tamoxifène, il est important de s'informer des saignements vaginaux. Le médecin examinera les seins, les ganglions lymphatiques régionaux, la paroi thoracique, les poumons et l'abdomen,**

**et vérifiera la présence d'un lymphœdème au niveau des bras. Chaque consultation annuelle devrait comporter une mammographie.**

Le traitement au tamoxifène entraîne une légère augmentation des risques de cancer de l'endomètre (preuves du niveau I)<sup>35,36</sup>. Les risques annuels s'élèvent à environ 2 femmes sur 1000 et sont plus élevés chez celles de plus de 50 ans que chez les femmes plus jeunes. La majorité des femmes qui prennent du tamoxifène, chez qui le cancer de l'endomètre se développe, auront des saignements vaginaux<sup>37</sup>. C'est pourquoi il importe de se renseigner sur les saignements vaginaux au cours de l'anamnèse<sup>34</sup>. Face à de tels saignements sans raison évidente, il faudrait effectuer une biopsie de l'endomètre. Le dépistage par échographie transvaginale ou par prélèvement endométrial n'est pas justifié car ces méthodes produisent des taux élevés de faux positifs et peu de résultats cliniques importants<sup>38,39</sup>.

Les examens physiques et mammographiques sont complémentaires : les résultats de l'examen mammographique peuvent être normaux même en présence d'un cancer palpable, et des cancers non palpables peuvent être dépistés par mammographie<sup>40-42</sup>. Bien qu'une analyse systématique de la littérature ait démontré que les avantages d'une mammographie annuelle se fondent seulement sur des séries de cas et des études d'observation<sup>43</sup>, les mammographies annuelles sont largement recommandées parallèlement à un examen médical régulier.

**On ne devrait pas effectuer de routine des analyses de laboratoire ou des examens radiologiques dans le but de détecter la présence de métastases à distance.**

En l'absence de preuves démontrant que le traitement précoce de la maladie métastatique prolongera la vie, on devrait éviter l'inconvénient et la dépense de faire passer des examens de routine en vue de la dépister. Dans une étude, 655 patientes qui avaient été assignées au hasard à recevoir une surveillance intensive comportant

des visites chez le médecin, une scintigraphie osseuse, une échographie du foie, une radiographie pulmonaire et des examens de laboratoire avaient une qualité de vie liée à la santé et une survie à 6 ans presque identiques à celles d'un groupe témoin de 665 femmes qui recevaient uniquement les examens indiqués sur le plan clinique (preuves de niveau I)<sup>25</sup>. Les deux groupes subissaient une mammographie annuelle du sein controlatéral. Dans une autre étude randomisée de taille et de durée semblables, les radiographies pulmonaires et les scintigraphies osseuses passées aux 6 mois n'ont eu aucune incidence sur le taux de mortalité à 5 ans<sup>26</sup>. Ces résultats ont été confirmés par une méta-analyse récente de ces études<sup>44</sup>. Mise à part la mammographie<sup>43</sup>, aucune preuve scientifique ne justifie l'utilisation de routine de tout autre examen par instruments ou en laboratoire, y compris les marqueurs biologiques<sup>33,34, 45,46,47</sup>.

**Il faudrait encourager les patientes à signaler rapidement tout nouveau symptôme persistant sans attendre le prochain rendez-vous.**

Les patientes devraient bien comprendre l'importance de signaler sans attendre leur prochain rendez-vous toute apparition de symptômes persistants tels qu'une douleur osseuse, une toux, des nodules aux seins, des modifications de la cicatrice de mastectomie, de la fatigue et de l'anorexie.

**Lorsqu'une femme souhaite faire l'auto-examen de ses seins, il convient de lui enseigner la bonne procédure.**

On ne recommande l'auto-examen des seins comme mesure de dépistage chez les femmes qui n'ont pas le cancer du sein<sup>48</sup>. En ce qui concerne les femmes ayant un cancer du sein, les preuves ne démontrent pas que l'auto-examen des seins peut améliorer les chances de survie. Dans le cadre d'une étude de suivi effectuée auprès de 1004 femmes chez qui on avait récemment diagnostiqué un cancer du

sein, les cancers décelés par celles qui pratiquaient l'auto-examen étaient plus petits et associés à une moins grande atteinte des ganglions lymphatiques axillaires<sup>49</sup>. Par conséquent, il est théoriquement possible qu'un diagnostic plus précoce améliore les chances de survie.

### **On devrait encourager et faciliter le soutien psychosocial.**

Le soutien psychosocial consiste à fournir des renseignements, des conseils ou de l'aide concrète par l'entremise d'un réseau social produisant des effets bénéfiques pour la destinataire<sup>50</sup>. Le soutien peut être fourni aux patientes par d'autres femmes qui ont eu un cancer du sein<sup>51</sup>. Les essais contrôlés randomisés qui évaluent l'effet des différentes formes d'interventions psychosociales sur les femmes qui ont eu un cancer du sein donnent les résultats conflictuels suivants : certaines ont révélé un effet positif sur certains aspects psychosociaux<sup>52,53,54,55</sup>, alors que d'autres n'en ont révélé aucun<sup>56</sup>.

Les effets des interventions psychosociales sur la survie demeurent également incertains. Même si une étude récente de Spiegel et ses collaborateurs a démontré une plus longue survie chez 86 patientes ayant un cancer du sein métastatique assignées au hasard à recevoir une intervention de soutien psychosocial que chez celles du groupe témoin<sup>57</sup>, une étude canadienne récente n'a pas révélé de différence, quant à la survie, entre 235 femmes ayant un cancer du sein métastatique assignées au hasard à recevoir une intervention de soutien psychosocial et celles du groupe témoin (preuves de niveau I)<sup>58</sup>.

De tels résultats sont difficiles à interpréter, en raison du grand nombre de groupes de patientes différentes, d'interventions et de conclusions sous étude. Néanmoins, au moment d'examiner les preuves, Fallowfield a recommandé que des interventions psychologiques figurent «fermement sur la liste des exigences relatives aux bons soins aux personnes atteintes de cancer»<sup>59</sup>. Le soutien

psychosocial devrait donc être encouragé et rendu accessible, qu'il soit fourni par des travailleurs de la santé, des membres de la famille, des amis ou des groupes de soutien organisés.

### **II faudrait encourager et favoriser la participation aux essais cliniques.**

L'amélioration des soins dispensés aux futures patientes atteintes d'un cancer du sein dépend de la participation de nombres suffisants de patientes à des études cliniques. Ainsi, les médecins qui traitent des patientes ayant le cancer du sein devraient informer les patientes des études en cours et les patientes devraient avoir la possibilité d'y participer.

### **II faudrait attribuer officiellement à un seul médecin la responsabilité du suivi.**

Bien que les spécialistes responsables du traitement (le chirurgien, l'oncologue ou le radio-oncologue) fixent habituellement la date des premières visites de suivi, la responsabilité des soins de suivi à long terme est rarement définie. Dans une étude italienne auprès de 284 femmes, un tiers des participantes se sont plaintes de difficultés au suivi en raison du manque de collaboration et d'intégration des procédures de suivi entre les spécialistes<sup>60</sup>.

Les personnes ou les organisations les plus aptes à mener un suivi peuvent différer selon les circonstances. Dans le cadre d'une étude britannique, le suivi en médecine générale a été jugé acceptable par les patientes et les omnipraticiens<sup>31</sup>. Dans cette même étude, qui touchait 296 femmes assignées au hasard à recevoir des soins de suivi à l'hôpital ou en médecine générale, on n'a constaté aucune différence significative entre les deux groupes pour le temps de confirmation d'une récurrence ou les mesures de la perception du fonctionnement social, de la santé mentale ou de la santé générale (preuves de niveau II)<sup>61</sup>. Au Canada, les soins de

suivi sont souvent dispensés par des spécialistes. Une étude menée dans le sud-ouest de l'Ontario auprès de 183 femmes atteintes d'un cancer du sein de stade I a révélé que les médecins de famille participaient aux soins de suivi de seulement 17,5 % des participantes<sup>62</sup>. Dans une autre étude canadienne, 968 femmes atteintes d'un cancer du sein de stade précoce et ayant terminé leur traitement primaire (p. ex. chimiothérapie ou radiothérapie) ont été assignées au hasard à recevoir un suivi de leur médecin de famille ou d'un oncologue dans un centre spécialisé en oncologie<sup>63</sup>. Au suivi médian de 3,5 ans, rien ne différenciait les deux groupes en ce qui concerne l'issue principale, c'est-à-dire les événements cliniques sévères (3,3 % dans le groupe du médecin de famille et 3,7 % dans le groupe du centre d'oncologie, soit 0,4 % d'écart; intervalle de confiance [IC] à 95 %, de -2,02 % à 2,83 %).

Dans une communication présentée à la Bari Consensus Conference, les auteurs ont conclu qu'après un suivi dispensé par leurs divers oncologues au cours d'une longue période de temps, les femmes risquaient de se sentir abandonnées lorsqu'elles quittaient le centre spécialisé. Ils ont conclu que les patientes voulaient qu'une «équipe» de professionnels de la santé soit accessible pour leur dispenser des soins et administrer des traitements au besoin<sup>51</sup>. Des chercheurs du Royaume-Uni ont tiré les mêmes conclusions<sup>64</sup>. Ainsi, quand des médecins de famille assument la responsabilité du suivi, une communication devrait être maintenue avec les spécialistes traitants. Lorsque la responsabilité du suivi est transférée, peu importe la personne responsable, la patiente doit prendre part à cette décision et doit être pleinement informée des plans de suivi, dès le début, afin d'éviter tout sentiment d'abandon.

**Il faut assurer une bonne communication entre tous les membres de l'équipe de façon à éviter de répéter les consultations et les analyses.**

Tous les professionnels de la santé qui ont participé au diagnostic et au traitement du cancer du sein d'une patiente ne souhaitent pas nécessairement être informés du suivi. Toutefois, pour ceux et celles qui le souhaitent, des ententes claires de transfert des données de suivi permettront d'améliorer les soins et d'éviter la répétition d'examens<sup>34</sup>.

### ***Questions particulières***

#### *Fonctionnement cognitif*

**La chimiothérapie peut avoir un effet prolongé sur le fonctionnement cognitif. Néanmoins, il n'y a pas de lien entre les plaintes subjectives de déficience cognitive et les mesures objectives.**

**Il faudrait promouvoir les études de cohorte, comparatives et longitudinales .**

Les femmes ayant eu un cancer du sein se plaignent souvent de problèmes de mémoire, un phénomène appelé en anglais «chemobrain» ou «chemofog»<sup>65</sup>. Phillips et Bernhard ont effectué récemment une revue de la littérature portant sur l'effet de la chimiothérapie adjuvante sur le fonctionnement cognitif chez les femmes qui ont eu un cancer du sein<sup>65</sup>. Ils ont trouvé quatre études transversales qui mesuraient la déficience cognitive chez les survivantes d'un cancer du sein<sup>66,67,68,69,70</sup>. Les quatre études ont révélé un certain degré de déficience cognitive.

Schagen et ses associés<sup>66</sup> ont trouvé une déficience cognitive beaucoup plus marquée chez les patientes qui recevaient une chimiothérapie à dose standard que chez celles du groupe témoin (rapport de cotes [RC] 6,4, IC à 95 %, de 1,5 à 27,6;  $p = 0,013$ ) 2 ans après le traitement. Dans cette étude, on n'a constaté aucune corrélation entre les rapports subjectifs de la déficience cognitive et les résultats de l'évaluation neuropsychologique objective.



Van Dam et ses collaborateurs ont comparé le fonctionnement cognitif entre 34 patientes qui avaient reçu une dose élevée de chimiothérapie, 36 patientes qui avaient reçu une dose standard et 34 patientes témoins qui n'avaient pas reçu de chimiothérapie; le temps moyen écoulé depuis la fin de la chimiothérapie était de 2 ans<sup>67</sup>. Les patientes ayant reçu de la chimiothérapie à dose élevée risquaient 8,2 fois plus d'éprouver une déficience cognitive (IC à 95 %, de 1,8 à 37,7;  $p = 0,006$ ) que les sujets témoins et 3,5 fois plus (IC à 95 %, de 1,0 à 12,8;  $p = 0,056$ ) que les patientes ayant reçu une dose standard. Ces résultats n'avaient aucun lien avec l'anxiété, la dépression ou la fatigue. Il n'existait aucune corrélation entre les rapports subjectifs du fonctionnement cognitif et les résultats de l'évaluation neuropsychologique objective. Un rapport de suivi de cette étude 4 ans après la fin du traitement a montré une amélioration du fonctionnement cognitif dans les deux groupes de chimiothérapie au niveau des problèmes signalés par les participantes et des résultats des évaluations neuropsychologiques<sup>70</sup>.

Brezden et ses collaborateurs<sup>68</sup> ont constaté que 31 patientes qui recevaient de la chimiothérapie au moment de l'étude avaient un fonctionnement cognitif pire que celui des sujets témoins ou des 40 patientes ayant terminé leur traitement de chimiothérapie 2 ans auparavant. Ces différences, toutefois, n'étaient pas statistiquement significatives.

Ahles et ses collaborateurs<sup>69</sup> ont étudié le fonctionnement cognitif de 35 patientes, 10 ans après la fin de leur traitement de chimiothérapie à dose standard, et ont constaté qu'il était significativement pire que celui des patientes atteintes d'un cancer du sein qui avaient reçu uniquement un traitement local.

Dans une étude récente de Tchen et ses collaborateurs, 110 femmes recevant un traitement adjuvant de chimiothérapie pour un cancer du sein ont été comparées avec un groupe témoin sans récurrence qui ne recevait pas de chimiothérapie<sup>71</sup>. Les auteurs ont constaté un taux plus élevé de déficience

cognitive moyenne ou sévère dans le groupe traité que dans le groupe témoin (16 % c. 4 %;  $p = 0,008$ ). De plus, les patientes soumises à la chimiothérapie éprouvaient plus de fatigue et plus de symptômes de ménopause et avaient une moins bonne qualité de vie.

Bien que ces études indiquent un effet de la chimiothérapie sur le fonctionnement cognitif, compte tenu de la force limitée des preuves, il serait prématuré de recommander des évaluations ou des interventions neuropsychologiques de routine. Toutes les études posaient des problèmes méthodologiques, tels qu'un manque de données de base afin d'évaluer le fonctionnement cognitif avant le traitement, la taille modeste des échantillons et l'incapacité de contrôler les facteurs hormonaux et l'usage du tamoxifène. En outre, les preuves se contredisent quant à la durée de l'effet à court ou à long terme. Deux des études ont également permis de conclure à l'absence de corrélation entre les plaintes subjectives et les mesures objectives du fonctionnement cognitif. Les médecins devraient évaluer et traiter les patientes qui éprouvent une détresse émotive, laquelle peut expliquer les plaintes subjectives concernant le fonctionnement cognitif déficient. Des études de cohortes, comparatives et longitudinales seront indispensables pour mieux comprendre la relation entre la chimiothérapie et la déficience cognitive.

### *Fatigue*

**Un quart à un tiers des femmes qui ont eu un cancer du sein éprouvent de la fatigue. Il faudrait interroger les patientes au sujet des symptômes de fatigue qu'elles ressentent.**

**Il faudrait rechercher les causes physiologiques de la fatigue pour les exclure. La dépression et la douleur constituent des facteurs sous-jacents que l'on peut parfois traiter.**

## **Il faudrait promouvoir les études longitudinales contrôlées de cohortes.**

La plupart des patientes atteintes d'un cancer du sein connaissent de la fatigue au cours du traitement<sup>72,73</sup>. Néanmoins, on a estimé que la prévalence de la fatigue un an après le traitement se situait entre 17<sup>74</sup> et 38 %<sup>72,75</sup>.

Les causes de la fatigue à la suite du traitement du cancer du sein n'ont pas été établies. La relation possible entre la fatigue et le traitement initial a fait l'objet d'études. Trois études ont conclu que la fatigue n'est liée ni au type de traitement reçu, ni à l'utilisation du tamoxifène, ni au temps écoulé depuis le traitement<sup>72,75,76</sup>. Dans une étude cas-témoins auprès de 61 patientes sans récurrence entre 3 et 36 mois après le traitement, Broeckel et ses collaborateurs<sup>73</sup> ont conclu que, lorsqu'on les compare aux sujets témoins, les femmes ayant un cancer du sein éprouvaient une fatigue plus prononcée ( $p < 0,01$ ) et une fatigue plus présente ( $p < 0,05$ ). Ils n'ont toutefois observé que des patientes ayant reçu de la chimiothérapie; il est par conséquent impossible de savoir si la chimiothérapie ou tout autre aspect du traitement et du diagnostic du cancer étaient des facteurs sous-jacents. Bower et ses associés<sup>72</sup> ont étudié 1957 femmes ayant eu un cancer du sein sans récurrence, entre un et cinq ans après le diagnostic initial de cancer du sein. Les femmes qui avaient reçu de la radiothérapie ou de la chimiothérapie, ou les deux, ont signalé des niveaux plus élevés de fatigue un an après le diagnostic que celles qui n'avaient pas reçu ces traitements ( $p = 0,02$ ); après un an, la différence des niveaux de fatigue liée au traitement n'était plus statistiquement significative. Woo et ses collaborateurs<sup>77</sup> ont constaté des niveaux de fatigue supérieurs chez les femmes qui recevaient un traitement combiné (c.-à-d. chimiothérapie plus radiothérapie) que chez celles qui recevaient d'autres types de traitement. Cependant, le taux de réponse très faible de 15 % semble indiquer un échantillon biaisé. De surcroît, les femmes ont été suivies pendant 18 mois seulement après le traitement.

L'analyse multivariée dans l'étude de Bower et ses collaborateurs<sup>72</sup> a révélé que les facteurs les plus importants associés à la fatigue étaient la dépression (RC 1,13;  $p = 0,0001$ ) et la douleur (RC 0,97;  $p = 0,0001$ ). Le type de traitement reçu (radiothérapie, RC 1,23,  $p = 0,19$ ; chimiothérapie, RC 1,29,  $p = 0,18$ ; radiothérapie plus chimiothérapie, RC 1,23,  $p = 0,25$ ) n'était pas associé à la fatigue dans l'analyse multivariée. Bower et ses associés ont également observé que les femmes ayant eu un cancer du sein signalaient des niveaux légèrement plus élevés d'énergie que les femmes du même âge dans la population en général ( $p = 0,009$ ). Dans le cadre d'une autre étude, Okuyama et ses collaborateurs ont observé que la dépression constituait une variable explicative importante de la fatigue<sup>76</sup>.

Beaucoup de femmes ayant eu un cancer du sein éprouvent de la fatigue. Selon les données actuelles, le mécanisme de la fatigue et la relation entre la fatigue et le mode de traitement primaire demeurent vagues. Il faudrait aborder la fatigue chez les femmes ayant eu un cancer du sein en investiguant et en excluant d'abord les causes physiologiques connues. De plus, les médecins devraient évaluer et traiter les patientes souffrant de dépression ou de douleur, éléments qui peuvent constituer les causes sous-jacentes de la fatigue. Des études longitudinales contrôlées de cohortes sont requises afin de mieux comprendre la prévalence et la cause de la fatigue chez les femmes ayant eu un cancer du sein.

#### *Contrôle du poids*

**Il faudrait aborder la question du contrôle du poids avec toutes les femmes qui ont eu un cancer du sein.**

**Il faudrait encourager les patientes ayant de l'embonpoint à participer à des programmes éprouvés de contrôle du poids.**

Le gain de poids est un problème courant chez les femmes ayant eu un cancer du sein<sup>78,79</sup>. Il a été associé au traitement adjuvant de chimiothérapie<sup>78,80</sup>, mais non au

traitement au tamoxifène (preuves de niveau I)<sup>37</sup>. Le gain de poids influence négativement la qualité de vie liée à la santé<sup>81</sup> et les maladies reliées à la prise de poids<sup>78,82</sup>. Il existe un corpus croissant de connaissances qui montre un lien entre l'obésité au moment du diagnostic ou le gain de poids après le diagnostic et les issues du cancer du sein telles que la récurrence et la survie<sup>82</sup>.

Chlebowski et ses collaborateurs<sup>82</sup> ont effectué une analyse systématique de la relation entre l'obésité au moment du diagnostic et l'issue du cancer du sein. Ils n'ont repéré que des études de cohortes et n'ont pas effectué de méta-analyse. Parmi les 34 études trouvées, 26 (pour un total de 29 460 patientes) ont démontré un lien statistique important entre l'obésité (mesurée de diverses façons) et la récurrence du cancer du sein ou la survie; 8 études (pour un total de 3727 patientes) n'ont constaté aucun de ces liens. Dans un rapport publié antérieurement au sujet d'une méta-analyse, le rapport de risque de l'effet d'une augmentation du poids corporel sur la récurrence du cancer du sein à 5 ans était de 1,78 (IC à 95 %, de 1,50 à 2,11) et sur la mortalité à 10 ans, de 1,36 (IC à 95 %, de 1,19 à 1,55)<sup>83</sup>.

Le *National Surgical Adjuvant Breast and Bowel Project* (NSABP) a récemment examiné le lien entre l'obésité et l'issue du cancer chez 3385 patientes atteintes d'un cancer du sein sans atteinte ganglionnaire inscrites à l'étude NSABP B-14, dans laquelle on a comparé le traitement au tamoxifène avec un placebo<sup>84</sup>. La récurrence du cancer du sein chez les femmes obèses était la même que chez les femmes de poids insuffisant et de poids normal (preuves de niveau I). La mortalité toutes causes était supérieure chez les femmes obèses que chez celles de poids normal, mais la mortalité attribuable au cancer du sein n'augmentait pas chez les femmes obèses.

Dans une analyse récente du cas de 5204 femmes ayant participé à la *Nurses' Health Study*, le poids avant le diagnostic et le gain de poids après celui-ci étaient associés à une hausse de la récurrence du cancer du sein et de la mortalité attribuable

à ce cancer chez les femmes n'ayant jamais fumé par rapport aux anciennes fumeuses et aux fumeuses actuelles<sup>85,86</sup>.

On a publié des lignes directrices de pratique clinique sur le contrôle du poids dans la population générale<sup>87</sup>. Il reste à savoir s'il est possible d'appliquer directement ces interventions aux femmes ayant eu un cancer du sein. Trois essais contrôlés randomisés évaluent les répercussions des interventions diététiques sur le contrôle du poids et le pronostic du cancer du sein<sup>88,89,90</sup>. Dans une étude récente, 41 % des patientes ont signalé avoir apporté des changements positifs à leur alimentation au cours des 12 mois suivant le diagnostic, ce qui suggère que les femmes ayant eu un cancer du sein sont disposées à modifier leur alimentation<sup>81</sup>.

Les recherches semblent indiquer que le gain de poids est plus probable chez les patientes qui ont reçu une chimiothérapie adjuvante que chez celles qui n'en ont pas reçue<sup>78</sup>. Il semble que le gain de poids soit attribuable à une diminution de l'activité physique plutôt qu'à une augmentation de l'apport énergétique, en plus d'être lié à un changement de la constitution du corps comprenant une augmentation du tissu adipeux par rapport à la masse corporelle maigre<sup>78</sup>. Bien que ces changements correspondent au début de la ménopause, dans une étude de cohorte portant sur 535 patientes suivies durant un an, Goodwin et ses associés ont constaté que la chimiothérapie et la ménopause étaient des variables explicatives indépendantes du gain de poids (tous  $p \leq 0,05$ )<sup>79</sup>. Ils ont de plus constaté que le traitement au tamoxifène ne permettait pas de prévoir un gain de poids chez les patientes suivies pendant un an après le diagnostic<sup>79</sup>. De même, dans une étude de cohorte portant sur 200 patientes atteintes d'un cancer du sein qui ne recevaient aucune chimiothérapie, il n'y avait aucune différence de gain de poids jusqu'à 5 ans après le diagnostic en comparant celles qui avaient pris du tamoxifène à celles qui n'en avaient pas pris (gain moyen de 1,2 kg; IC à 95 % pour la différence, de -1,8 à 1,2;  $p = 0,66$ )<sup>91</sup>. Au cours d'un essai contrôlé randomisé auprès de femmes présentant

des risques élevés de cancer du sein, le traitement au tamoxifène n'était pas associé à un gain de poids comparativement au placebo (preuves de niveau I)<sup>37</sup>. Même si ces preuves pèsent solidement contre les répercussions du tamoxifène sur le gain de poids, il y a lieu de noter que l'étude portait sur des femmes qui présentaient des risques élevés de cancer du sein plutôt que sur les femmes ayant eu un cancer du sein.

De plus en plus de preuves démontrent un lien positif entre l'obésité au moment du diagnostic ou le gain de poids après le diagnostic et l'issue du cancer du sein, même si, pour l'instant, aucune preuve déterminante ne confirme qu'une perte de poids après le diagnostic influence l'issue du cancer du sein. Cependant, compte tenu de l'effet positif du contrôle du poids sur d'autres éléments importants de comorbidité qui peuvent affecter les femmes ayant eu un cancer du sein<sup>87</sup>, on recommande que le contrôle du poids et les mesures efficaces à cette fin fassent l'objet d'une discussion avec les patientes.

### *Ostéoporose*

**Les patientes ménopausées, les patientes préménopausées qui sont à risque d'ostéoporose et les patientes qui prennent des inhibiteurs de l'aromatase devraient passer un examen de mesure de la densité osseuse.**

**Il faudrait conseiller les patientes au sujet de l'exercice et de l'apport adéquat en calcium et en vitamine D.**

**Le traitement de l'ostéoporose devrait comprendre un bisphosphonate.**

Les femmes qui ont des antécédents de cancer du sein peuvent courir un risque accru d'ostéoporose en raison d'une insuffisance ovarienne prématurée causée par la chimiothérapie<sup>92,93,94,95</sup>. De plus, les résultats préliminaires d'études sur des inhibiteurs de l'aromatase comme traitement adjuvant du cancer du sein chez les

femmes ménopausées semblent indiquer une augmentation du nombre des fractures et des cas d'ostéoporose liés à l'usage de ces agents<sup>96,97,98,99,100</sup>.

Les plus récents guides de la Société de l'ostéoporose du Canada recommandent que les femmes ménopausées de plus de 65 ans, en bonne santé et ne présentant pas de risques d'ostéoporose autres que l'âge, passent après 65 ans un test de mesure de la densité osseuse par ostéodensitométrie biénergétique à rayons X<sup>101</sup>. Les femmes qui présentent des facteurs de risque d'ostéoporose peuvent être examinées plus jeunes<sup>101</sup>. Le traitement à l'inhibiteur de l'aromatase et l'insuffisance ovarienne prématurée sont considérés comme des facteurs de risque majeurs d'ostéoporose<sup>102</sup>. On peut donc extrapoler ces lignes directrices aux femmes qui ont des antécédents de cancer du sein. Les femmes qui prennent un inhibiteur de l'aromatase devraient passer un test de mesure de la densité osseuse de base et être surveillées de près en vue de détecter l'apparition d'ostéoporose. Rien ne prouve clairement quelle devrait être la fréquence du suivi de la mesure de la densité osseuse chez ces patientes. Dans ces cas, les cliniciens doivent se référer aux lignes directrices publiées sur le traitement et la surveillance de l'ostéoporose chez les femmes qui présentent d'autres facteurs de risque élevés.

Le guide sur les bisphosphonates de la American Society of Clinical Oncology contient des commentaires sur la santé des os des femmes qui ont des antécédents de cancer du sein<sup>102</sup>. Le guide recommande que les femmes ayant un cancer du sein qui présentent des risques élevés d'ostéoporose (p. ex. âgées > 65 ans, ayant des antécédents familiaux d'ostéoporose ou une ménopause prématurée à la suite d'un traitement) passent un test de mesure de la densité osseuse et, selon les résultats, reçoivent un traitement aux bisphosphonates. Comme dans le cas des femmes en santé, le suivi des femmes atteintes d'un cancer du sein doit comporter des tests opportuns de mesure de la densité osseuse et un traitement aux bisphosphonates lorsque la densité chute<sup>92,101</sup>.



Un certain nombre d'essais contrôlés randomisés menés sur des femmes en santé ont démontré l'efficacité des bisphosphonates dans le traitement de l'ostéoporose<sup>103,104,105,106</sup>. Les lignes directrices canadiennes sur l'ostéoporose recommandent les bisphosphonates comme traitement de premier recours de l'ostéoporose<sup>101</sup>. Chez les femmes atteintes d'un cancer du sein, on a enquêté sur les bisphosphonates, tels que le clodronate et le risédronate, en vue de prévenir les métastases osseuses<sup>92,107,108</sup>. La densité osseuse était une issue secondaire de ces études. On a constaté une diminution moins importante de la densité osseuse associée au traitement aux bisphosphonates qu'à celui du placebo chez les femmes ayant un cancer primaire du sein<sup>92,107,108</sup>. De même, des études appuient l'administration de bisphosphonates pour traiter ou prévenir la perte osseuse causée par un inhibiteur de l'aromatase<sup>109,110</sup>. Il faudrait renseigner les femmes au sujet de l'importance de la santé des os, de l'apport recommandé de calcium et de vitamine D par l'alimentation ou les suppléments, et d'un régime d'exercices<sup>101</sup>. Un certain nombre d'études récentes ont évalué l'efficacité des bisphosphonates pour la prévention des métastases osseuses, et les résultats sont contradictoires<sup>111,112,113,114,115,116</sup>. Il serait donc prématuré de formuler des recommandations sur l'usage des bisphosphonates à cette fin.

L'administration de calcitonine intranasale est approuvée pour utilisation au sein de la population générale pour traiter l'ostéoporose et a démontré une réduction de la douleur liée aux fractures aiguës à la colonne (preuves de niveau I)<sup>101</sup>. On ne signale toutefois aucune étude sur la calcitonine menée spécifiquement auprès de femmes atteintes d'un cancer du sein.

En raison de ses effets pro-œstrogéniques, le tamoxifène préserve la densité osseuse chez les femmes ménopausées. Cependant, son utilisation est liée à une perte de densité osseuse chez les femmes préménopausées<sup>117</sup>. Le raloxifène, comme le tamoxifène, est un modulateur sélectif des récepteurs œstrogéniques qui

a des effets pro-œstrogéniques sur le métabolisme osseux. Même si le raloxifène et les bisphosphonates sont considérés comme des traitements de premier recours dans la prévention et le traitement de l'ostéoporose chez les femmes ménopausées<sup>101</sup> (preuves de niveau I), il existe peu de données sur la sécurité du raloxifène chez les femmes qui ont des antécédents de cancer du sein<sup>118</sup>. Par conséquent, le raloxifène n'est pas conseillé aux femmes qui ont des antécédents de cancer du sein. Cette recommandation se fonde sur le fait que le médicament est similaire au tamoxifène et que l'utilisation du tamoxifène pendant 10 ans est associée à une augmentation des récurrences de cancer du sein comparativement à une utilisation du médicament pendant 5 ans<sup>119,120</sup>. De plus, les études menées en laboratoire confirment que le raloxifène peut stimuler les cellules dépendantes du tamoxifène<sup>121</sup>.

Bien que le traitement de substitution de l'œstrogène réduise la perte de densité osseuse associée à la ménopause, son utilisation est contre-indiquée chez les femmes qui ont des antécédents de cancer du sein de crainte de provoquer une récurrence du cancer du sein<sup>122</sup>. On a mis un terme récemment à un essai clinique randomisé au cours de laquelle on administrait soit un traitement hormonal substitutif soit aucun traitement à des femmes ayant des antécédents de cancer du sein, en raison d'un risque croissant de développer un nouveau cancer du sein<sup>123</sup>.

### *Sexualité*

#### **Il faudrait aborder la question de la sexualité avec les femmes lors de leurs visites de suivi.**

Les femmes atteintes d'un cancer du sein signalent fréquemment une baisse du désir sexuel, une diminution de la fréquence des relations sexuelles, la dyspareunie et des difficultés à atteindre l'orgasme<sup>124,125,126</sup>. Néanmoins, selon la plupart des études, la sexualité chez les femmes ayant eu un cancer du sein paraît semblable à

celle des femmes en santé du même âge<sup>124,127,128</sup>. Le taux le plus élevé de dysfonction sexuelle chez les femmes traitées pour un cancer du sein a été signalé parmi celles qui ont reçu de la chimiothérapie<sup>125,126</sup>. À part le fait d'entraîner plus de symptômes vasomoteurs, le traitement au tamoxifène, comparativement à tout autre traitement systémique, n'a pas d'effet sur la sexualité<sup>125,126,129</sup>. Ganz et ses collaborateurs ont étudié les facteurs les plus importants associés à l'intérêt, à la satisfaction et à la dysfonction sexuels à l'aide d'une analyse de régression multivariée dans une cohorte de femmes ayant eu un cancer du sein<sup>130</sup>. Les facteurs associés de façon statistiquement significative à l'intérêt sexuel comprenaient le fait d'être avec un nouveau partenaire depuis le diagnostic du cancer du sein (plus d'intérêt sexuel;  $p \leq 0,05$ ), d'avoir une meilleure cote d'état mental (plus d'intérêt sexuel;  $p \leq 0,01$ ) et d'avoir une plus faible image corporelle (moins d'intérêt sexuel;  $p \leq 0,001$ ). Les facteurs les plus importants associés à la dysfonction sexuelle consistaient en la sécheresse vaginale (plus grande dysfonction;  $p \leq 0,001$ ), un traitement antérieur de chimiothérapie (plus grande dysfonction;  $p \leq 0,05$ ) et le fait d'être avec un nouveau partenaire depuis le diagnostic (moins grande dysfonction;  $p \leq 0,05$ ). La qualité de la relation avec le partenaire (meilleur score relationnel associé à une plus grande satisfaction sexuelle;  $p \leq 0,001$ ) et des problèmes sexuels avec le partenaire (moins de satisfaction sexuelle;  $p \leq 0,001$ ) représentaient des prédicteurs importants de la satisfaction sexuelle.

Un certain nombre d'études ont démontré que, même si le type de chirurgie peut avoir un impact sur l'image corporelle, la sexualité ne s'en trouve pas affectée négativement<sup>131,132,133</sup>. Une méta-analyse d'études sur les effets psychosociaux de la chirurgie pour cancer du sein a montré des conséquences modestes du type de chirurgie sur la sexualité<sup>134</sup>.

Ganz et ses collaborateurs ont évalué l'efficacité d'un programme d'intervention consistant en une évaluation complète de la ménopause offerte à 76 femmes pérимénopausées ou ménopausées ayant des antécédents de cancer du sein<sup>135</sup>. L'intervention a été menée par une infirmière praticienne diplômée et était axée sur l'évaluation des symptômes, l'éducation et les conseils ainsi que sur des interventions pharmacologiques et comportementales précises, au besoin. La sexualité s'est améliorée de façon significative au sein du groupe qui recevait l'intervention comparativement à celui qui recevait les soins habituels ( $p = 0,04$ ; preuves de niveau I).

Beaucoup d'études portant sur la sexualité des femmes ayant eu un cancer du sein étaient rétrospectives ou utilisaient une méthode qualitative. Il importera de recueillir des données prospectives, en particulier d'essais randomisés auprès de femmes qui reçoivent de la chimiothérapie avec suivi à long terme.

La sexualité devrait faire l'objet de discussions lors des visites de suivi. On devrait alors discuter des interventions visant à faire diminuer les symptômes de ménopause (spécialement la sécheresse vaginale), ce qui pourrait contribuer à améliorer la sexualité<sup>136</sup>. Des recommandations visant le traitement des symptômes de ménopause ont déjà été publiées sous forme de lignes directrices (voir le Guide 14).

### *Grossesse*

**Il faudrait expliquer aux femmes qui envisagent une grossesse après avoir reçu un diagnostic de cancer du sein qu'il existe peu de données sur les répercussions d'une grossesse sur l'issue du cancer du sein, notamment la récurrence et la survie. La plupart des études ont porté sur des séries de cas rétrospectifs ou des études cas-témoin portant sur de petits nombres de patientes. Néanmoins, rien ne prouve à ce jour qu'une**

## **grossesse subséquente nuit à la survie des patientes qui ont eu un cancer du sein.**

Comme beaucoup de femmes qui reçoivent un diagnostic de cancer du sein sont en âge de procréer, les questions liées à une grossesse subséquente prennent de l'importance. L'élément préoccupant, en l'occurrence, c'est que les niveaux élevés d'œstrogène associés à la grossesse risquent de stimuler des micrométastases à l'état latent chez les femmes ayant eu un cancer du sein. Un certain nombre de séries de cas et d'études cas-témoin ont été publiées, dans lesquelles on évalue la survie à la suite d'une grossesse après un diagnostic de cancer du sein<sup>137-151</sup>. La majorité des études ont démontré que la grossesse subséquente chez les femmes ayant eu un cancer du sein ne nuit pas à leurs chances de survie<sup>137,138,140,143,144,149-151</sup>. Ces études ont cependant été menées auprès de petits nombres de patientes et étaient de nature rétrospective, ce qui les rend susceptibles d'erreurs systématiques importantes. De surcroît, la plupart des études manquaient de groupes témoins convenablement assortis ou portaient sur des patientes choisies de manière très sélective. Aucune étude de cohorte n'a été signalée et un essai contrôlé randomisé serait clairement irréalisable.

Les décisions relatives à une grossesse devraient faire l'objet d'une discussion entre la patiente et son médecin. La décision doit peser les répercussions d'une grossesse sur l'issue du cancer du sein et la préoccupation liée à la baisse de la fertilité avec l'âge. De plus, une grossesse dans les 5 ans après le diagnostic de cancer du sein exigera probablement l'interruption précoce de l'hormonothérapie adjuvante, ce qui pourrait entraîner une diminution des avantages. Il ne semble pas y avoir d'augmentation des malformations congénitales chez les nouveau-nés des femmes qui ont reçu de la chimiothérapie avant leur grossesse<sup>138,141,152</sup>.

Cet article a fait l'objet d'un examen par les pairs.

**Remerciements** : Nous remercions les personnes suivantes de leurs conseils précieux : le D<sup>r</sup> Patricia Ganz, Jonsson Comprehensive Cancer Center, Los Angeles (Californie); le D<sup>r</sup> Pamela Goodwin, Mount Sinai Hospital, Toronto (Ontario); le D<sup>r</sup> Eric Winer, Dana-Farber Cancer Institute, Boston (Massachusetts).

**Le Comité directeur des guides de pratique clinique pour la prise en charge et le traitement du cancer du sein – Président** : D<sup>r</sup> Mark Levine (Action Cancer Ontario), Juravinski Regional Cancer Centre et Université McMaster, Hamilton (Ontario). **Membres** : D<sup>r</sup> Penny Barnes, Queen Elizabeth II Health Sciences Centre, Halifax (Nouvelle-Écosse); D<sup>r</sup> Judy Caines (Comité consultatif fédéral-provincial-territorial sur les services de santé), Nova Scotia Cancer Centre, Halifax (Nouvelle-Écosse); D<sup>r</sup> Beverley Carter (Corporation des soins de santé de St. John's), St. Clare's Mercy Hospital, St. John's (Terre-Neuve-et-Labrador); D<sup>r</sup> Eva Grunfeld (Collège des médecins de famille du Canada), Cancer Care Nova Scotia, Halifax (Nouvelle-Écosse); D<sup>r</sup> Ivo Olivotto (British Columbia Cancer Agency), Vancouver Island Cancer Centre et Université de la Colombie-Britannique, Victoria (C.-B.); D<sup>r</sup> Carol Sawka, Action Cancer Ontario, Toronto (Ontario); D<sup>r</sup> Hugh Scarth (Corporation des sciences de la santé de l'Atlantique), Hôpital régional de Saint John, Saint John (Nouveau-Brunswick); D<sup>r</sup> Timothy Whelan (Action Cancer Ontario), Juravinski Regional Cancer Centre et Université McMaster, Hamilton (Ontario).

**Correspondance** : D<sup>r</sup> Mark Levine, Room 104, Henderson Research Centre, Henderson Hospital, 711 Concession St., Hamilton (Ontario) L8V 1C3;  
télécopieur : (905) 389-9288.

### **Références**

1. Comité directeur des guides de pratique clinique pour la prise en charge et le traitement du cancer du sein, *Guides de pratique clinique pour la prise en charge et le traitement du cancer du sein*, un document canadien de consensus. 9. Suivi après un traitement du cancer du sein, *JAMC* 1998, vol. 158 (3 suppl.) : S65-70.

2. D. L. Sackett, «Rules of evidence and clinical recommendations on the use of antithrombotic agents», *Chest*, 1989, vol. 95, (suppl.) : 2S-4S.
3. Comité directeur des guides de pratique clinique pour la prise en charge et le traitement du cancer du sein, Guide de pratique clinique pour la prise en charge et le traitement du cancer du sein, un document canadien de consensus. Introduction, *JAMC* 1998, 158 (3 suppl.) : S1-2.
4. P. A. Ganz, A. Coscarelli, C. Fred, B. Kahn et M. L. Polinsky et L. Petersen, «Breast cancer survivors: psychosocial concerns and quality of life», *Breast Cancer Research and Treatment*, 1996, vol. 38, p. 183-199.
5. P. A. Ganz, L. Kwan, A. L. Stanton, J. L. Krupnick, J. H. Rowland, B. E. Meyerowitz et coll, «Quality of life at the end of primary treatment of breast cancer: first results from the Moving Beyond Cancer randomized trial», *Journal of the National Cancer Institute*, 2004, vol. 96, p. 376-387.
6. P. A. Ganz, K. A. Desmond, B. Leedham, J. H. Rowland, B. E. Meyerowitz et T. R. Belin, «Quality of life in long-term disease-free survivors of breast cancer: a follow-up study», *Journal of the National Cancer Institute*, 2002, vol. 94, p. 39-49.
7. W. Janni, D. Rjosk, T. H. Dimpfl, K. Haertl, B. Strobl, F. Hepp et coll, «Quality of life influenced by primary surgical treatment for stage I-III breast cancer — long-term follow-up of a matched-pair analysis», *Annals of Surgical Oncology*, 2001, vol. 8, p. 542-548.
8. D. E. Stewart, A. M. Cheung, S. Duff, F. Wong, M. McQuestion, T. Cheng et coll, «Long-term breast cancer survivors: confidentiality, disclosure, effects on work and insurance», *Psychooncology*, 2001, vol. 10, p. 259-263.
9. P. A. Ganz, G. A. Greendale, L. Petersen, B. Kahn et J. E. Bower, «Breast cancer in younger women: reproductive and late health effects of treatment», *Journal of Clinical Oncology*, 2003, vol. 21, p. 4184-4193.
10. P. A. Ganz, E. Guadagnoli, M. B. Landrum, T. L. Lash, W. Rakowski et R. A. Silliman, «Breast cancer in older women: quality of life and psychosocial adjustment in the 15 months after diagnosis», *Journal of Clinical Oncology*, 2003, vol. 21, p. 4027-4033.
11. R. Day, P. A. Ganz et J. P. Costantino, «Tamoxifen and depression: more evidence from the National Surgical Adjuvant Breast and Bowel Project's breast cancer prevention (P-1) randomized study», *Journal of the National Cancer Institute*, 2001, vol. 93, p. 1615-1623.
12. U. Veronesi, N. Cascinelli, L. Mariani, M. Greco, R. Saccozzi, A. Luini et coll., «Twenty-year follow-up of a randomized study comparing breast-conserving surgery with radical mastectomy for early breast cancer», *National English Journal of Medicine*, 2002, vol. 347, p.1227-1232.
13. B. Fisher, S. Anderson, J. Bryant, R. Margolese, M. Deutsch, E. Fisher et coll., «Twenty-year follow-up of a randomized trial comparing total mastectomy,

lumpectomy, and lumpectomy plus irradiation for the treatment of invasive breast cancer», *National English Journal of Medicine*, 2002, vol. 347, p. 1233-1241.

14. S. G. Orel, R. H. Troupin, E. A. Patterson et B. L. Fowble, «Breast cancer recurrence after lumpectomy and irradiation: role of mammography in detection», *Radiology*, 1992, vol. 183, p. 201-206.

15. M. J. Kennedy et M. D. Abeloff, «Management of locally recurrent breast cancer», *Cancer*, 1993, vol. 71, p. 2395-2409.

16. T. Whelan, R. Clark, R. Roberts, M. Levine et G. Foster, «Ipsilateral breast tumor recurrence postlumpectomy is predictive of subsequent mortality: results from a randomized trial», *International Journal of Radiation Oncology, Biology, Physics*, 1994, vol. 30, no 1, p. 11-16.

17. B. Fisher, S. Anderson, E. R. Fisher, C. Redmond, D. L. Wickerham, N. Wolmark et coll., «Significance of ipsilateral breast tumour recurrence after lumpectomy», *Lancet*, 1991, vol. 338, p. 327-331.

18. Y. Chen, W. Thompson, R. Semenciw et Y. Mao., «Epidemiology of contralateral breast cancer *Cancer Epidemiology Biomarkers Prevention*, 1999, vol. 8, p. 855-861.

19. J. D. Iglehart, «Prophylactic mastectomy», dans J. R. Harris, M. E. Lippman, M. Morrow, C. K. Osborne, éditeurs, *Diseases of the breast*, 2e édition, Philadelphie, Lippincott Williams and Wilkins, 2000, p. 259-264.

20. D. E. Heron, L. T. Komarnichky, T. Hyslop, G. F. Schwartz, et C. M. Masfield, «Bilateral breast carcinoma: risk factors and outcomes for patients with synchronous and metachronous disease» *Cancer*, 2000, vol. 88, p. 2739-2750.

21. R. A. Smith et C. J. Orsi, «Screening for breast cancer», dans J. R. Harris, M.E. Lippman, M. Morrow et C. K. Osborne, éditeurs, *Diseases of the breast*, 2e édition, Philadelphie, Lippincott Williams et Wilkins, 2000. p. 101-121.

22. D. Schapira et N. Urban, «A minimalist policy for breast cancer surveillance», *Journal of the American Medical Association*, 1991, vol. 265, p. 380-382.

23. M. Churn et V. Kelly, «Outpatient follow-up after treatment for early breast cancer: updated results after 5 years», *Clinical Oncology (R Coll Radiol)*, 2001, vol. 13, p. 187-194.

24. D. S. Te Boekhorst, N. G. Peer, R. F. van der Sluis, T. Wobbes et T. J. Ruers, «Periodic follow-up after breast cancer and the effect on survival», *European Journal of Survey*, 2001, vol. 167, p.490-496.

25. The GIVIO Investigators, «Impact of follow-up testing on survival and health-related quality of in breast cancer patients. A multicenter randomized controlled trial», *Journal of the American Medical Association*, 1994, vol. 271, p. 1587-1592.

26. M. Roselli Del Turco, D. Palli, A. Cariddi, S. Ciatto, P. Pacini et V. Distanto, «Intensive diagnostic follow-up after treatment of primary breast cancer. A randomized trial. National Research Council Project on Breast Cancer follow-up», *Journal of the American Medical Association*, 1994, vol. 271, p. 1593-1597.



27. H. J. Jacobs, J. A. Van Dijck, E. M. de Kleijn, L. A. Kiemeny et A. L. Verbeek, «Routine follow-up examinations in breast cancer patients have minimal impact on life expectancy: a simulation study *Annals Oncology*, 2001, vol. 12, p. 1107-1113.
28. E. Grunfeld, D. Mant, M. P. Vessey et P. Yudkin, «Evaluating primary care follow-up of breast cancer: methods and preliminary results of three studies», *Annals Oncology*, 1995, vol. 6, (suppl.) p. 47-52.
29. T. Gulliford, M. Opomu, E. Wilson, I. Hanham et R. Epstein, «Popularity of less frequent follow-up for breast cancer in randomised study: initial findings from the hotline study», *British Medical Journal (BMJ)*, 1997, vol. 314, p. 174-177.
30. L. Brown, S. Payne et G. Royle, «Patient initiated follow up of breast cancer», *Psycho-oncology*, 2002, vol. 11, p. 346-355.
31. C. L. Loprinzi, «It is now the age to define the appropriate follow-up of primary breast cancer patients (editorial)», *Journal of Clinical Oncology*, 1994, vol. 12, p. 881-883.
32. J. Dewar, «Follow-up in breast cancer: a suitable case for reappraisal (editorial)», *BMJ*, 1995, vol. 310, p. 685-686.
33. F. Boccardo, P. Bruzzi, L. Cionini, C. Confalonieri, R. Fossati, M. Gion et coll., «Appropriateness of the use of clinical and radiologic examinations and laboratory tests in the follow-up of surgically-treated breast cancer patients. Results of the Working Group on the Clinical Aspects of Follow-up», *Annals Oncology*, 1995, vol. 6, (suppl. 2), S57-59.
34. T. J. Smith, N. E. Davidson, D. V. Schapira, E. Grunfeld, H. B. Muss, V. G. Vogel III et coll., pour American Society of Clinical Oncology Breast Cancer Surveillance Expert Panel, «American Society of Clinical Oncology 1998 update of recommended breast cancer surveillance guidelines», *Journal Clinical Oncology*, 1999, vol. 17, p. 1080-1082.
35. B. Fisher, J. P. Costantino, C. K. Redmond, E. R. Fisher, D. L. Wickerham et W. M. Cronin, «Endometrial cancer in tamoxifen-treated breast cancer patients: findings from the National Surgical Adjuvant Breast and Bowel Project (NSABP) B-14», *Journal of the National Cancer Institute*, 1994, vol. 86, p. 527-537.
36. L. E. Rutqvist, H. Johansson, T. Signomklao, U. Johansson, T. Fornander et N. Wilking, «Adjuvant tamoxifen therapy for early stage breast cancer and second primary malignancies. Stockholm Breast Cancer Study Group», *Journal of the National Cancer Institute*, 1995, vol. 87, p. 645-651.
37. B. Fisher, J. P. Costantino, D. L. Wickerham, C. K. Redmond, M. Kavanah, W. M. Cronin et coll., «Tamoxifen for prevention of breast cancer: report of the National Surgical Adjuvant Breast and Bowel Project P-1 Study», *Journal of the National Cancer Institute*, 1998, vol. 90, p. 1371-1388.
38. R. R. Barakat, T. A. Gilewski, L. Almadrones, P. E. Saigo, E. Venkatraman, C. Hudis et coll., «Effect of adjuvant tamoxifen on the endometrium in women with

breast cancer: a prospective study using office endometrial biopsy», *Journal of Clinical Oncology*, 2000, vol. 18, p. 3459-3463.

39. B. Gerber, A. Krause, H. Muller, T. Reimer, T. Kelz, J. Makovitzky et coll., «Effects of adjuvant tamoxifen on the endometrium in postmenopausal women with breast cancer: a prospective long-term study using transvaginal ultrasound», *Journal of Clinical Oncology*, 2000, vol. 18, p. 3464-3470.

40. W. A. Mellink, R. Holland, J. H. Hendriks, P. H. Peeters, E. J. Rutgers et W. A. Van Daal, «The contribution of routine follow-up mammography to an early detection of asynchronous contralateral breast cancer», *Cancer*, 1991, vol. 67, p. 1844-1848.

41. P. R. Hassell, I. A. Olivotto, H. A. Mueller, G. W. Kingston et V. E. Basco, «Early breast cancer: detection of recurrence after conservative surgery and radiation therapy», *Radiology*, 1990, vol. 176, p. 731-735.

42. P. C. Stomper, A. Recht, A. L. Berenberg, M. S. Jochelson et J. R. Harris, «Mammographic detection of recurrent cancer in the irradiated breast», *American Journal of Roentgenology*, 1987, vol. 148, p. 39-43.

43. E. Grunfeld, H. Noorani, L. McGahan, L. Paszat, D. Coyle, C. Van Walraven et coll., «Surveillance mammography after treatment of primary breast cancer: a systematic review», *The Breast*, 2002, vol. 11, p. 228-235.

44. M. P. Rojas, E. Telaro, A. Russo, I. Moschetti, L. Coe, R. Fossati et coll., «Follow-up strategies for women treated for early breast cancer (Cochrane review)», *The Cochrane Library*, vol. 1, 2005. Oxford, Update Software.

45. J. Dewar, «Follow up in breast cancer: a suitable case for reappraisal», *BMJ*, 1995, vol. 310, p. 685-686.

46. American Society of Clinical Oncology, «Clinical practice guidelines for the use of tumor markers in breast and colorectal cancer», *Journal of Clinical Oncology*, 1996, vol. 14, p. 2843-2877.

47. L. D. Wagman, R. D. Sanders, J. J. Terz, J. D. Beatty, W. A. Kokal et D. U. Riihimaki, «The value of symptom directed evaluation in the surveillance for recurrence of carcinoma of the breast», *Surgery, Gynecology, Obstetrics*, 1991, vol. 172, p. 191-196.

48. N. Baxter, «Groupe d'étude canadien sur les soins de santé preventifs. Soins de santé preventifs, mise à jour : Les femmes devraient-elles procéder régulièrement à l'auto-examen des seins pour le dépistage du cancer du sein?», *JAMC*, 2001, vol. 164 no 13, p. 1837-1846.

49. R. S. Jr. Foster et M. C. Constanza, «Breast self-examination practices and breast cancer survival», *Cancer*, 1984, vol. 53, p. 999-1005.

50. B. H. Gottlieb et P. M. Selby, «Social support and mental health: a review of the literature», *Ottawa, Santé et bien-être social Canada*, 1989.

51. «The patient's point of view. Results of the Working Group on Socio-Psychological Implications of Follow-up», *Annals Oncology*, 1995, vol 6, (suppl. 2), S65-8.
52. J. M. McArdle, W. D. George, C. S. McArdle, D. C. Smith, A. R. Moodie, A. V. Hughson et coll., «Psychological support for patients undergoing breast cancer surgery: a randomised study», *BMJ*, 1996, vol. 312, p. 813-816.
53. S. M. Allen, C. Shah, A. M. Nezu, C. M. Nezu, D. Ciambrone, J. Hogan et coll., «A problem-solving approach to stress reduction among younger women with breast carcinoma. A randomized controlled trial», *Cancer*, 2002, vol. 94, p. 3089-3100.
54. S. Fukui, M. Koike, A. Ooba et Y. Uchitomi, «The effect of a psychosocial group intervention on loneliness and social support for Japanese women with primary breast cancer», *Oncology Nurses Forum*, 2003, vol. 30, p. 823-830.
55. K. L. Taylor, R. M. Lamdan, J. E. Siegel, R. Shelby, K. Moran-Klimi et M. Hrywna, «Psychological adjustment among African American breast cancer patients: one-year follow-up results of a randomized psychoeducational group intervention», *Health Psychol*, 2003, vol. 22, p. 316-323.
56. S. P. Heiney, J. McWayne, T. G. Hurley, L. S. Lamb Jr., L. H. Bryant, W. Butler et coll., «Efficacy of therapeutic group by telephone for women with breast cancer», *Cancer Nursing*, 2003, vol. 26, p. 439-447.
57. D. Spiegel, J. R. Bloom, H. C. Kraemer et E. Gottheil, «Effect of psychosocial treatment on survival of patients with metastatic breast cancer», *Lancet*, 1989, vol. 2, p. 888-891.
58. P. J. Goodwin, M. Leszcz, M. Ennis, J. Koopmans, L. Vincent, H. Guther et coll., «The effect of group psychosocial support on survival in metastatic breast cancer», *New England Journal of Medicine*, 2001, vol. 345, p. 1719-1726.
59. L. Fallowfield, «Psychosocial interventions in cancer», *BMJ*, 1995, vol. 311, p. 1316-1317.
60. A. Paradiso, P. Nitti, P. Frezza, N. Scorpiglione, G.S.Bio.Ca.M., «A survey in Puglia: the attitudes and opinions of specialists, general physicians and patients on follow-up practice», *Annals Oncology*, 1995, vol. 6, (suppl. 2), S53-6.
61. E. Grunfeld, D. Mant, P. Yudkin, R. Adewuyi-Dalton, D. Cole, J. Stewart et coll., «Routine follow-up of breast cancer in primary care: randomised trial», *BMJ*, 1996, vol. 313, p. 665-669.
62. A. Worster, M. L. Wood, I. R. McWhinney et M. J. Bass, «Who provides follow-up care for patients with early breast cancer?», *Can Fam Physician*, 1995, vol. 41, p. 1314-1320.
63. E. Grunfeld, M. Levine, J. Julian, K. Pritchard, D. Coyle, D. Mirsky et coll., «A randomized controlled trial (RCT) of routine follow-up for early stage breast cancer: a comparison of primary care versus specialist care (abstract)», *Proceedings of the American Society of Clinical Oncology*, 2004, vol. 23, p. 43.

64. R. Adewuyi-Dalton, S. Ziebland, E. Grunfeld et A. Hall, «Patients' views of routine hospital follow-up: a qualitative study of women with breast cancer in remission», *Psychooncology*, 1998, vol. 7, p. 436-439.
65. K. A. Phillips et J. Bernhard, «Adjuvant breast cancer treatment and cognitive function: current knowledge and research directions», *Journal of the National Cancer Institute*, 2003, vol. 95, p. 190-197.
66. S. B. Schagen, F. S. Van Dam, M. J. Muller, W. Boogerd, J. Lindeboom et P. F. Bruning, «Cognitive deficits after postoperative adjuvant chemotherapy for breast carcinoma», *Cancer*, 1999, vol. 85, p. 640-650.
67. F. S. Van Dam, S. B. Schagen, M. J. Muller, W. Boogerd, E. Vd Wall et M. E. Droogleever Fortuyn, «Impairment of cognitive function in women receiving adjuvant treatment for high-risk breast cancer: high-dose versus standard-dose chemotherapy», *Journal of the National Cancer Institute*, 1998, vol. 90, p. 210-218.
68. C. B. Brezden, K. A. Phillips, M. Abdoell, T. Bunston et I. F. Tannock, «Cognitive function in breast cancer patients receiving adjuvant chemotherapy», *Journal of Clinical Oncology*, 2000, vol. 18, p. 2695-2701.
69. T. A. Ahles, A. J. Saykin, C. T. Furstenberg, B. Cole, L. A. Mott, K. Skalla et coll., «Neuropsychologic impact of standard-dose systemic chemotherapy in long-term survivors of breast cancer and lymphoma», *Journal of Clinical Oncology*, 2002, vol. 20, p. 485-493.
70. S. B. Schagen, M. J. Muller, W. Boogerd, R. M. Rosenbrand, D. Van Rhijn, S. Rodenhuis et coll., «Late effects of adjuvant chemotherapy on cognitive function: a follow-up study in breast cancer patients», *Annals Oncology*, 2002, vol. 13, p. 1387-1397.
71. N. Tchen, H. G. Juffs, F. P. Downie, Q.-L. Yi, H. Hu, I. Chemerynsky et coll., «Cognitive function, fatigue, and menopausal symptoms in women receiving adjuvant chemotherapy for breast cancer», *Journal of Clinical Oncology*, 2003, vol. 21, p. 4175-4183.
72. J. E. Bower, P. A. Ganz, K. A. Desmond, J. H. Rowland, B. E. Meyerowitz et T. R. Belin, «Fatigue in breast cancer survivors: occurrence, correlates, and impact on quality of life», *Journal of Clinical Oncology*, 2000, vol. 18, p. 743-753.
73. J. A. Broeckel, P. B. Jacobson, J. Horton, L. Balducci et G. H. Lyman, «Characteristics and correlates of fatigue after adjuvant therapy for breast cancer», *Journal of Clinical Oncology*, 1998, vol. 16, p. 1689-1696.
74. D. Cella, K. Davis, W. Breitbart et G. Curt. Fatigue Coalition, «Cancer-related fatigue: prevalence of proposed diagnostic criteria in a United States sample of cancer survivors», *Journal of Clinical Oncology*, 2001, vol. 19, p. 3385-3391.
75. P. Servaes, S. Verhagen et G. Bleijenberg, «Determinants of chronic fatigue in disease-free breast cancer patients: a cross-sectional study», *Annals Oncology*, 2002, vol. 13, p. 589-598.

76. T. Okuyama, T. Akechi, A. Kugaya, H. Okamura, S. Imoto, T. Nakano et coll., «Factors correlated with fatigue in disease-free breast cancer patients: application of the Cancer Fatigue Scale», *Support Care Cancer*, 2000, vol. 8, p. 215-222.
77. B. Woo, S. L. Dibble, B. F. Piper, S. B. Keating et M. C. Weiss, «Differences in fatigue by treatment methods in women with breast cancer», *Oncology Nurses Forum*, 1998, vol. 25, p. 915-920.
78. W. Demark-Wahnefried, B. L. Peterson, E. P. Winer, L. Marks, N. Aziz, P. K. Marcom et coll., «Changes in weight, body composition, and factors influencing energy balance among premenopausal breast cancer patients receiving adjuvant chemotherapy», *Journal of Clinical Oncology*, 2001, vol. 19, p. 2381-2389.
79. P. J. Goodwin, M. Ennis, K. I. Pritchard, D. McCready, J. Koo, S. Sidlofsky et coll., «Adjuvant treatment and onset of menopause predict weight gain after breast cancer diagnosis», *Journal of Clinical Oncology*, 1999, vol. 17, p. 120-129.
80. C. L. Rock, S. W. Flatt, V. Newman, B. J. Caan, M. N. Haan, M. L. Stefanick et coll., «Factors associated with weight gain in women after diagnosis of breast cancer», *Journal of American Diet Association*, 1999, vol. 99, p. 1212-1221.
81. E. Maunsell, M. Drolet, J. Brisson, J. Robert et L. Deschênes, «Dietary change after breast cancer: extent, predictors, and relation with psychological distress», *Journal of Clinical Oncology*, 2002, vol. 20, p. 1017-1025.
82. R. T. Chlebowski, E. Aiello et A. McTiernan, «Weight loss in breast cancer patient management», *Journal of Clinical Oncology*, 2002, vol. 20, p. 1128-1143.
83. P. J. Goodwin, M. J. Esplen, J. Wincour, K. Butler et K. I. Pritchard, «Development of a weight management program in women with newly diagnosed locoregional breast cancer», dans J. Bitzer, M. Stauber, éditeurs, *Psychosomatic obstetrics and gynecology*, Bologne, Italie, Monduzzi Editore, International Proceedings Division, 1995, p. 491-496.
84. J. J. Dignam, K. Wieand, K. A. Johnson, B. Fisher, L. Xu et E. P. Mamouonas, «Obesity, tamoxifen use, and outcomes in women with estrogen receptor-positive early-stage breast cancer», *Journal of the National Cancer Institute*, 2003, vol. 95, p. 1467-1476.
85. C. H. Kroenke, W. Y. Chen, B. Rosner et M. D. Holmes, «Weight, weight gain and survival after breast cancer diagnosis», *Journal of Clinical Oncology*, 2005, vol. 23 no 7, p. 1370-1378.
86. R. T. Chlebowski, «Obesity and early-stage breast cancer (editorial)», *Journal of Clinical Oncology*, 2005, vol. 23 no 7, p. 1345-1347.
87. National Institutes of Health, «Clinical guidelines on the identification, evaluation, and treatment of overweight and obesity in adults – the evidence report», *Obesity Research*, 1998, vol. 6, 51S-209S.
88. R. T. Chlebowski, D. Rose, I. M. Buzzard, G. L. Blackburn, W. Insull Jr., M. Grosvenor et coll., «Adjuvant dietary fat intake reduction in postmenopausal breast

cancer patient management. The Women's Intervention Nutrition Study (WINS)», *Breast Cancer Research and Treatment*, 1992, vol. 20, p. 73-84.

89. J. P. Pierce, S. Faerber, F. A. Wright, C. L. Rock, V. Newman, S. W. Flatt et coll., «A randomized trial of the effect of a plant-based dietary pattern on additional breast cancer events and survival: the Women's Healthy Eating and Living (WHEL) Study», *Controlled Clinical Trials*, 2002, vol. 23, p. 728-756.

90. C. Ritenbaugh, R. E. Patterson, R. T. Chlebowski, B. Caan, L. Fels-Tinker, B. Howard et coll., «The Women's Health Initiative Dietary Modification trial: overview and baseline characteristics of participants», *Annals Epidemiology*, 2003, vol. 13, S87-97.

91. N. B. Kumar, K. Allen, A. Cantor, C. E. Cox, H. Greenberg, S. Shah et coll., «Weight gain associated with adjuvant tamoxifen therapy in stage I and II breast cancer: Fact or artifact?», *Breast Cancer Research and Treatment*, 1997, vol. 44, p. 135-143.

92. T. Saarto, C. Blomqvist, M. Valimaki, P. Makela, S. Sarna et I. Elomaa, «Chemical castration induced by adjuvant cyclophosphamide, methotrexate, and fluorouracil chemotherapy causes rapid bone loss that is reduced by clodronate: a randomized study in premenopausal breast cancer patients», *Journal of Clinical Oncology*, 1997, vol. 15, p. 1341-1347.

93. J. A. Headley, R. L. Thériault, A. D. LeBlanc, R. Vassilopoulou-Sellin et G. N. Hortobagyi, «Pilot study of bone mineral density in breast cancer patients treated with adjuvant chemotherapy», *Cancer Investigation*, 1998, vol. 16, p. 6-11.

94. J. J. Twiss, N. Waltman, C. D. Ott, G. J. Gross, A. M. Lindsey et T. E. Moore, «Bone mineral density in postmenopausal breast cancer survivors», *Journal of the American Academy of Nurse Practitioners*, 2001, vol. 13, p. 276-284.

95. J. A. Kanis, E. V. McCloskey, T. Powles, A. H. Paterson, S. Ashley et T. Spector, «A high incidence of vertebral fracture in women with breast cancer», *British Journal of Cancer*, 1999, vol. 79, p. 1179-1181.

96. The ATAC (Arimidex, Tamoxifen Alone or in Combination) Trialists' Group, «Anastrozole alone or in combination with tamoxifen versus tamoxifen alone for adjuvant treatment of postmenopausal women with early breast cancer: first results of the ATAC randomised trial», *Lancet*, 2002, vol. 359, p. 2131-2139.

97. P. E. Goss, J. N. Ingle, S. Martino, N. J. Robert, H. B. Muss, M. J. Piccart et coll., «A randomized trial of letrozole in postmenopausal women after five years of tamoxifen therapy for early-stage breast cancer», *National English Journal of Medicine*, 2003, vol. 349, p. 1793-1802.

98. R. C. Coombes, E. Hall, L. J. Gibson, R. Paridaens, J. Jassem, T. Delozier et coll., «A randomized trial of exemestane after two to three years of tamoxifen therapy in postmenopausal women with primary breast cancer», *National English Journal of Medicine*, 2004, vol. 350, p. 1081-1092.

99. ATAC Trialists' Group, «Results of the ATAC (Arimidex, Tamoxifen, Alone or in Combination) trial after completion of 5 years' adjuvant treatment for breast cancer», *Lancet*, 2005, vol. 365, p. 60-62.
100. E. A. Perez, R. G. Josse, K. I. Pritchard, J. N. Ingle, S. Martino, B. P. Findlay et coll., «Effect of letrozole versus placebo on bone mineral density in women completing > 5 years (yrs) of adjuvant tamoxifen: NCIC CTG MA.17b (abstract)», *Breast Cancer Research and Treatment*, 2004, vol. 88, (suppl. 1), S36.
101. J. P. Brown et R. G. Josse pour le Conseil consultative scientifique de la Société de l'ostéoporose du Canada, «2002 clinical practice guidelines for the diagnosis and management of osteoporosis in Canada», *JMAC*, 2002, vol. 167, (10 suppl.), S1-34.
102. B. E. Hillner, J. N. Ingle, R. T. Chlebowski, J. Gralow, G. C. Yee, N. A. Janjan et coll., «American Society of Clinical Oncology 2003 update on the role of bisphosphonates and bone health issues in women with breast cancer», *Journal of Clinical Oncology*, 2003, vol. 21, p. 4042-4057.
103. T. Storm, G. Thamsborg, T. Steiniche, H. K. Genant et O. H. Sorensen, «Effect of intermittent cyclical etidronate therapy on bone mass and fracture rate in women postmenopausal osteoporosis», *National English Journal of Medicine*, 1990, vol. 322, p. 1265-1271.
104. N. B. Watts, S. T. Harris, H. K. Genant, R. D. Wasnich, P. D. Miller, R. D. Jackson et coll., «Intermittent cyclical etidronate treatment of postmenopausal osteoporosis», *National English Journal of Medicine*, 1990, vol. 323, p. 73-79.
105. H. A. Pols, D. Felsenberg, D. A. Hanley, J. Stepan, M. Munoz-Torres, T. J. Wilkin et coll., «Multinational placebo-controlled, randomized trial of the effects of alendronate on bone density and fracture risk in postmenopausal women with low bone mass: results of the FOSIT Study. Foxamax International Trial Study Group», *Osteoporosis International*, 1999, vol. 9, p. 461-468.
106. D. M. Black, D. E. Thompson, D. C. Bauer, K. Ensrud, T. Musliner, M. C. Hochberg et coll., «Fracture risk reduction with alendronate in women with osteoporosis: the Fracture Intervention Trial (FIT) Research Group», *J Clin Endocrinol Metab*, 2000, vol. 85, p. 4118-4124.
107. P. D. Delmas, R. Balena, E. Confravreux, C. Hardouin, P. Hardy et A. Bremond, «Bisphosphonate risedronate prevents bone loss in women with artificial menopause due to chemotherapy of breast cancer: a double-blind, placebo-controlled study», *Journal of Clinical Oncology*, 1997, vol. 15, p. 955-962.
108. T. J. Powles, E. McCloskey, A. H. Paterson, S. Ashley, V. A. Tidy, A. Nevantaus et coll., «Oral clodronate and reduction in loss of bone mineral density in women with operable primary breast cancer», *Journal of the National Cancer Institute*, 1998, vol. 90, p. 704-708.
109. M. Gnant, R. Jakesz, B. Mlineritsch, G. Luschin-Ebengreuth, M. Schmid, C. Menzel et coll., «Zoledronic acid effectively counteracts cancer treatment induced bone loss (CTIBL) in premenopausal breast cancer patients receiving adjuvant endocrine treatment with goserelin plus anastrozole versus goserelin plus tamoxifen

- bone density subprotocol results of a randomized multicenter trial (ABCSG-12) (abstract)», *Breast Cancer Research and Treatment*, 2004, vol. 88, (suppl. 1), S8-9.

110. A. Brufsky, G. Harker, T. Beck, R. Carroll, E. Tan-Chiu, C. Seidler et coll., «Zoledronic acid (ZA) for prevention of cancer treatment-induced bone loss (CTIBL) in postmenopausal women (PMW) with early breast cancer (Bca) receiving adjuvant Letrozole (Let): Preliminary results of the Z-FAST trial (abstract 1114)», San Antonio Breast Cancer Symposium, du 8 au 11 décembre 2004, San Antonio.

111. T. Powles, S. Paterson, J. A. Kanis, E. McCloskey, S. Ashley, A. Tidy, et coll., «Randomized, placebo-controlled trial of clodronate in patients with primary operable breast cancer», *Journal of Clinical Oncology*, 2002, vol. 20, p. 3219-3224.

112. T. Powles, A. Paterson, E. McCloskey, M. Kurkilahti et J. Kanis, «Oral clodronate for adjuvant treatment of operable breast cancer: results of a randomized, double-blind, placebo-controlled multicenter trial (abstract)», *Proceedings of the American Society of Clinical Oncology*, 2004, vol. 23, p. 23:29.

113. T. Saarto, C. Blomqvist, P. Virkkunen et I. Elomaa, «Adjuvant clodronate treatment does not reduce the frequency of skeletal metastases in node-positive breast cancer patients: 5-year results of a randomized controlled trial», *Journal of Clinical Oncology*, 2001, vol. 19, p.10-17.

114. T. Saarto, L. Vehmanen, C. Blomqvist et I. Elomaa, «Ten-year follow-up of a randomized controlled trial of adjuvant clodronate treatment in node-positive breast cancer patients (abstract)», *Proceedings of the American Society of Clinical Oncology*, 2004, vol. 23, p. 8.

115. I. J. Diel, E. Solomayer, C. Gollan, F. Schutz, G. Bastert, «Bisphosphonates in the reduction of metastases in breast cancer: results of the extended follow-up of the first study population (abstract)», *Proceedings of the American Society of Clinical Oncology*, 2000, vol. 19, p. 82a.

116. A. Jaschke, G. Bastert, E. F. Solomayer, S. Costa, F. Schuetz et I. J. Diel, «Adjuvant clodronate treatment improves the overall survival of primary breast cancer patients with micrometastases to bone marrow – a longtime follow-up», *Proceedings of the American Society of Clinical Oncology*, 2004, vol. 23, p. 9.

117. T. J. Powles, T. Hickish, T. A. Kanis, A. Tidy et S. Ashley, «Effect of tamoxifen on bone mineral density measured by dual-energy x-ray absorptiometry in healthy premenopausal and postmenopausal women», *Journal of Clinical Oncology*, 1996, vol. 14, p. 78-84.

118. K. I. Pritchard, M. Levine, B. Walley et Ad Hoc Raloxifene in Breast Cancer Group, «Raloxifene: handle with care (letter)», *JAMC*, 2001, vol. 165 no2, p. 151, 153.

119. B. Fisher, J. Dignam, J. Bryant, A. DeCillis, D. L. Wickerham, N. Wolmark et col., «Five versus more than five years of tamoxifen therapy for breast cancer patients with negative lymph nodes and estrogen receptor-positive tumors», *Journal of the National Cancer Institute*, 1996, vol. 88, p. 1529-1542.



120. H. J. Stewart, A. P. Forrest, D. Everington, C. C. McDonald, J. J. Dewar, R. A. Hawkins et col., «Randomized comparison of 5 years of adjuvant tamoxifen with continuous therapy for operable breast cancer. The Scottish Cancer Trials Breast Group», *British Journal Cancer*, 1996, vol. 74, p. 297-299.
121. R. M. O'Regan, C. Gajdos, R. Dardes, A. de los Reyes, D. J. Bentrem et V.C Jordan, «Effect of raloxifene after tamoxifen on breast and endometrial cancer growth (abstract)», Proceedings of the American Society of *Clinical Oncology*, 2001, vol. 20, p. 25a.
122. K. I. Pritchard, H. Khan, M. Levine du Comité directeur sur les guides de pratique clinique pour la prise en charge et le traitement du cancer au sein, *Guide de pratique clinique pour la prise en charge et le traitement du cancer du sein*, no 14, «The role of hormone replacement therapy in women with a previous diagnosis of breast cancer», *JAMC*, 2002, vol. 166, no 8, p. 1017-1022.
123. L. Holmberg, H. Anderson, for the HABITS steering and data monitoring committees, «HABITS (hormonal replacement therapy after breast cancer – Is it safe?), a randomised comparison: trial stopped», *Lancet*, 2004, vol. 363, p. 453-455.
124. B. E. Meyerowitz, K. A. Desmond, J. H. Rowland, G. E. Wyatt et P. A. Ganz, «Sexuality following breast cancer», *J Sex Marital Therapy*, 1999, vol. 25, p. 237-250.
125. G. Berglund, M. Nystedt, C. Bolund, P. Sjoden et L. Rutquist, «Effect of endocrine treatment on sexuality in premenopausal breast cancer patients: a prospective randomized study», *Journal of Clinical Oncology*, 2001, vol. 19, p. 2788-2796.
126. M. J. Mourits, I. Bockerman, E. G. de Vries, A. G. van der Zee, K. A. ten Hoor, W. T. van der Graf, et col., «Tamoxifen effects on subjective and psychosocial well-being, in a randomised breast cancer study comparing high-dose and standard-dose chemotherapy», *British Journal Cancer*, 2002, vol. 86, p. 1546-1550.
127. F. Joly, M. Espie, M. Marty, J. F. Heron et M. Henry-Amar, «Long-term quality of life in premenopausal women with node-negative localized breast cancer treated with or without adjuvant chemotherapy», *British Journal Cancer*, 2000, vol. 83, p. 577-582.
128. P. A. Ganz, J. H. Rowland, K. Desmond, B. E. Meyerowitz et G. E. Wyatt, «Life after breast cancer: understanding women's health-related quality of life and sexual functioning», *Journal of Clinical Oncology*, 1998, vol. 16, p. 501-514.
129. J. E. Mortimer, L. Boucher, J. Baty, D. L. Knapp, E. Ryan et J. H. Rowland, «Effect of tamoxifen on sexual functioning in patients with breast cancer», *Journal of Clinical Oncology*, 1999, vol. 17, p. 1488-1492.
130. P. A. Ganz, K. A. Desmond, T. R. Belin, B. E. Meyerowitz et J. H. Rowland, «Predictors of sexual health in women after a breast cancer diagnosis *Journal of Clinical Oncology*, 1999, vol. 17, p. 2371-2380.

131. I. L. Wapnir, R. P. Cody et R. S. Greco, «Subtle differences in quality of life after breast cancer surgery», *Annals of Surgical Oncology*, 1999, vol. 6, p. 359-366.
132. J. H. Rowland, K. A. Desmond, B. E. Meyerowitz, T. R. Belin, G. E. Wyatt et P. A. Ganz, «Role of breast reconstructive surgery in physical and emotional outcomes among breast cancer survivors», *Journal of the National Cancer Institute*, 2000, vol. 90, p. 1422-1429.
133. M. Dorval, E. Maunsell, L. Deschênes et J. Brisson, «Type of mastectomy and quality of life for long term breast carcinoma survivors», *Cancer*, 1998, vol. 83, p. 2130-2138.
134. A. Moyer, «Psychosocial outcomes of breast-conserving surgery versus mastectomy: a meta-analytic review», *Health Psychology*, 1997, vol. 16, p. 284-298.
135. P. A. Ganz, G. A. Greendale, L. Petersen, L. Zibecchi, B. Kahn et T. R. Belin, «Managing menopausal symptoms in breast cancer survivors: results of a randomized controlled trial», *Journal of the National Cancer Institute*, 2000, vol. 92, p. 1054-1064.
136. A. Hordern, «Intimacy and sexuality for the woman with breast cancer», *Cancer Nursing*, 2000, vol, 23, p. 230-236.
137. D. R. Cooper et J. Butterfield, «Pregnancy subsequent to mastectomy for cancer of the breast *Annals Surgery*, 1970, vol. 171, p. 429-433.
138. G. Ribeiro, D. A. Jones et M. Jones, «Carcinoma of the breast associated with pregnancy», *British Journal Surgery*, 1986, vol. 73, p. 607-609.
139. I. M. Ariel et R. Kempner, «The prognosis of patients who become pregnant after mastectomy for breast cancer», *International Surgery*, 1989, vol. 74, p. 185-187.
140. A. E. Lethaby, M. A. O'Neill, B. H. Mason, I. M. Holdaway et V. J. Harvey, «Overall survival from breast cancer in women pregnant or lactating at or after diagnosis», *International Journal Cancer*, 1996, vol. 67, p. 751-755.
141. N. A. Malamos, G. P. Stathopoulos, A. Keramopoulos, J. Papadiamantis, S. Vassilaros, «Pregnancy and offspring after the appearance of breast cancer», *Oncology*, 1996, vol. 53, p. 471-475.
142. P. Nugent et T. X. O'Connell, «Breast cancer and pregnancy», *Archives of Surgery*, 1985, vol. p. 1221-1224.
143. N. Kroman, M. B. Jensen, M. Melbye, J. Wohlfahrt et H. T. Mouridsen, «Should women be advised against pregnancy after breast-cancer treatment?», *Lancet*, 1997, vol. 350, p. 319-322.
144. R. Sankila, S. Heinavaara et T. Hakulinen, «Survival of breast cancer patients after subsequent pregnancy: " healthy mother effect." », *American Journal of Obstetrics and Gynecology*, 1994, vol. 170, p. 818-823.

145. R. Sutton, A. U. Buzdar et G. N. Hortobagyi, «Pregnancy and offspring after adjuvant chemotherapy in breast cancer patients», *Cancer*, 1990, vol. 65, p. 847-850.
146. P. Velentgas, J. R. Daling, K. E. Malone, N. S. Weiss, M. A. Williams, S. G. Self et coll., «Pregnancy after breast carcinoma. Outcomes and influence on mortality», *Cancer*, 1999, vol. p. 2424-2432.
147. E. Von Schoultz, H. Johansson, N. Wilking et L. E. Rutqvist, «Influence of prior and subsequent pregnancy on breast cancer prognosis», *Journal of Clinical Oncology*, 1995, vol. 13, p. 430-434.
148. L. Mignot, F. Morvan et D. Sarrazin, «Breast cancer and subsequent pregnancy», *Proceedings of the American Society of Clinical Oncology*, 1986, vol. 5, p. 57.
149. S. Gelber, A. S. Coates, A. Goldhirsch, M. Castiglione-Gertsch, G. Marini, J. Lindtner et coll., «Effect of pregnancy on overall survival after the diagnosis of early-stage breast cancer», *Journal Clinical Oncology*, 2001, vol. 19, p. 1671-1675.
150. S. S. Upponi, F. Ahmad, I. S. Whitaker et A. D. Purushotham, «Pregnancy after breast cancer». *European Journal of Cancer*, 2003, vol. 39, p. 736-741.
151. B. A. Mueller, M. S. Simon, D. Deapen, A. Kamineni, K. E. Malone et J. R. Daling, «Childbearing and survival after breast carcinoma in young women», *Cancer*, 2003, vol. 98, p. 1131-1140.
152. R. Sutton, A. U. Buzdar et G. N. Hortobagyi, «Pregnancy and offspring after adjuvant chemotherapy», *Cancer*, 1990, vol. 65, p. 847-850.
